# Supplementary material
Source: publisher figshare collection journal article supplement (https://acs.figshare.com/ndownloader/files/3792550)
Supplement: Supplementary file 1 [file 3792550]

## Supporting Information

### Synthesis and Biological Evaluation of Novel Olean-28,13 $\beta$ -lactams as Potential Anti-prostate Cancer Agents

Yong Ai,<sup>a,b</sup> Yang Hu,<sup>a</sup> Fenghua Kang,<sup>a,b</sup> Yisheng Lai,<sup>a,b</sup> Yanju Jia,<sup>a</sup> Zhangjian  
Huang,<sup>a,b,\*</sup> Sixun Peng,<sup>a,b</sup> Hui Ji,<sup>a,\*</sup> Jide Tian,<sup>c</sup> and Yihua Zhang<sup>a,b,\*</sup>

Table of contents:

|                                                                       |       |
|-----------------------------------------------------------------------|-------|
| 1. HPLC assessment of compound purity                                 | S2-S5 |
| 2. Log <i>P</i> of selective compounds (Table S1.)                    | S5    |
| 3. Possible metabolic products of <b>10h</b> and CDDO-Me. (Table S2.) | S6    |

HPLC assessment of compound purity.

All tested compounds (**10a-i**) with a purity of > 95% were used for subsequent biological assays. We provided the spectra of HPLC assays as below.

Column: Inertex C18 (150 mm × 4.6 mm × 5 μm);

Mobile phase: Methanol-Water (85:15 to 90:10, v/v);

Wavelength: 244 nm;

Rate: 0.8 mL/min;

Temperature: 25 °C;

**10a**, 98.2%

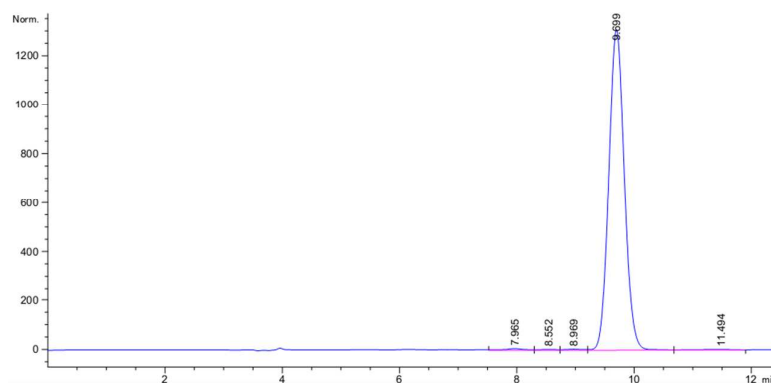

**10b**, 98.0%

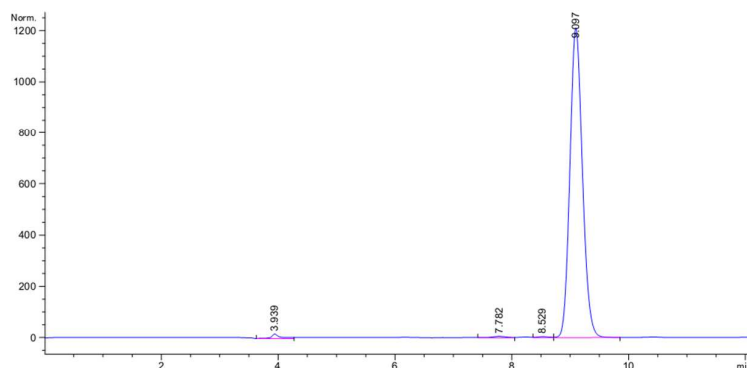

**10c**, 97.6%

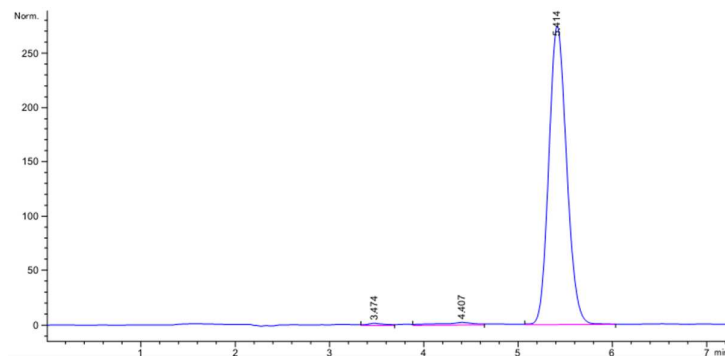

**10d, 99.6%**

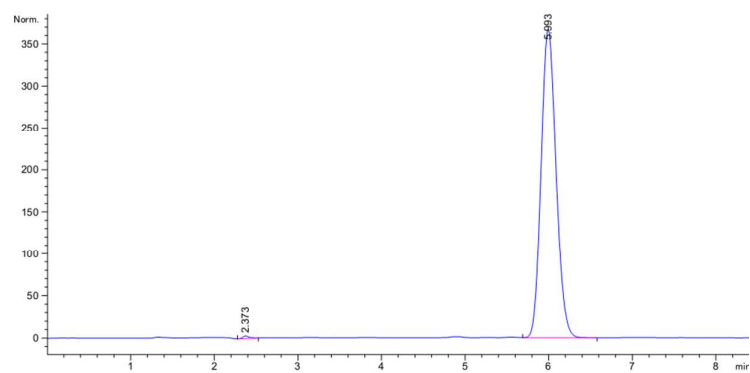

**10e, 97%**

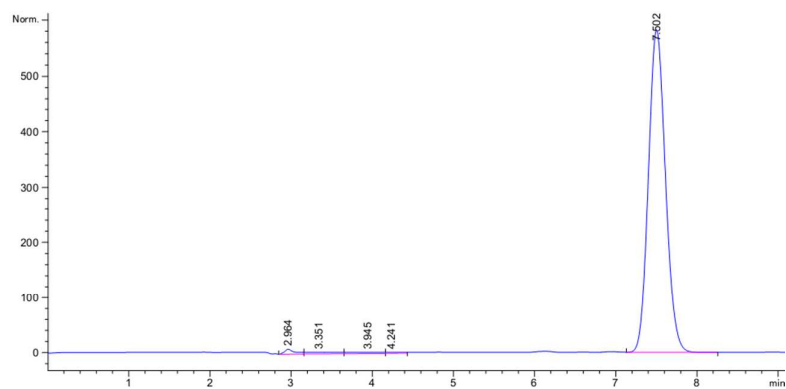

**10f, 95.2%**

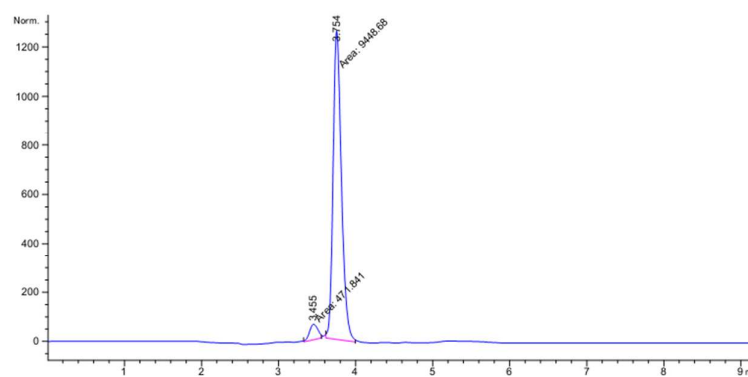

**10g, 95.5%**

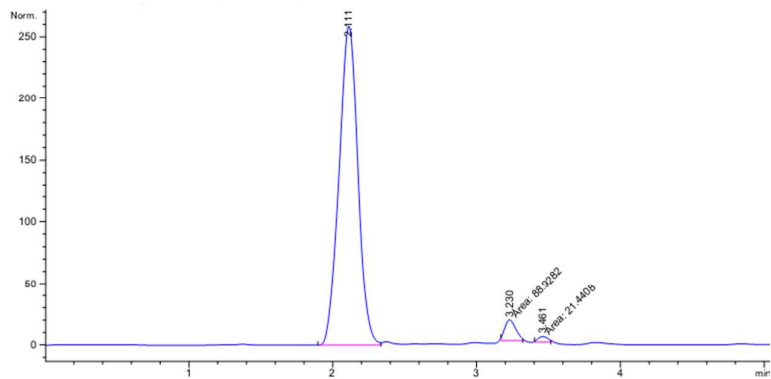

**10h, 96.4%**

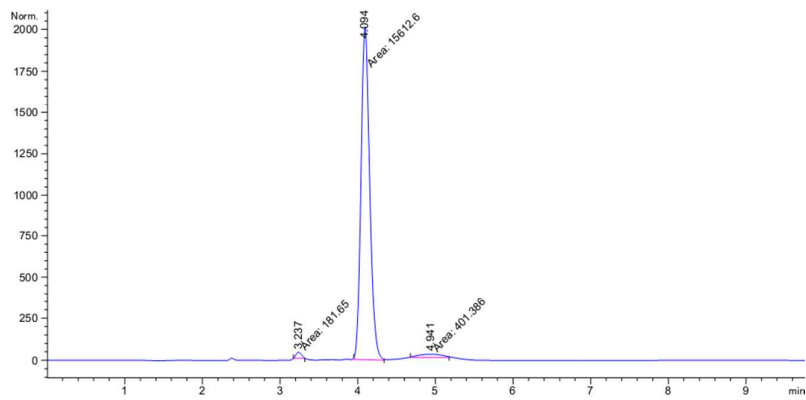

**10i, 98.3%**

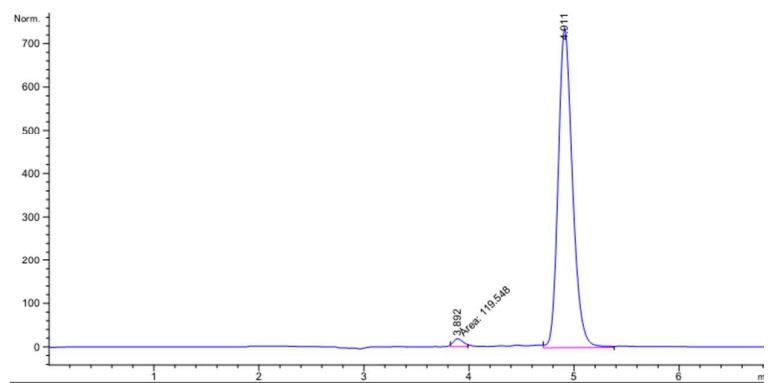

**11h, 100%**

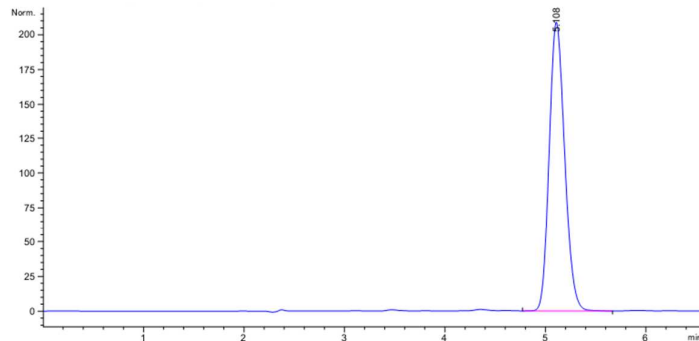

**Table S1.** The Log *P* of selective compounds

| Compd      | Log <i>P</i> | Compd      | Log <i>P</i> |
|------------|--------------|------------|--------------|
| <b>10a</b> | 5.4 ± 0.9    | <b>10e</b> | 7.2 ± 0.1    |
| <b>10b</b> | 5.8 ± 0.9    | <b>10f</b> | 6.3 ± 0.5    |
| <b>10c</b> | 6.1 ± 0.7    | <b>10g</b> | 4.5 ± 0.5    |
| <b>10d</b> | 6.5 ± 0.4    | <b>10i</b> | 6.8 ± 0.3    |
| CDDO-Im    | 5.7 ± 0.3    |            |              |

<sup>a</sup>Log *P* values were calculated using the methods reported previously. Data are expressed as the means ± SD from three different programs.

**Table S2.** Possible metabolic products of **10h** and CDDO-Me.<sup>a</sup>

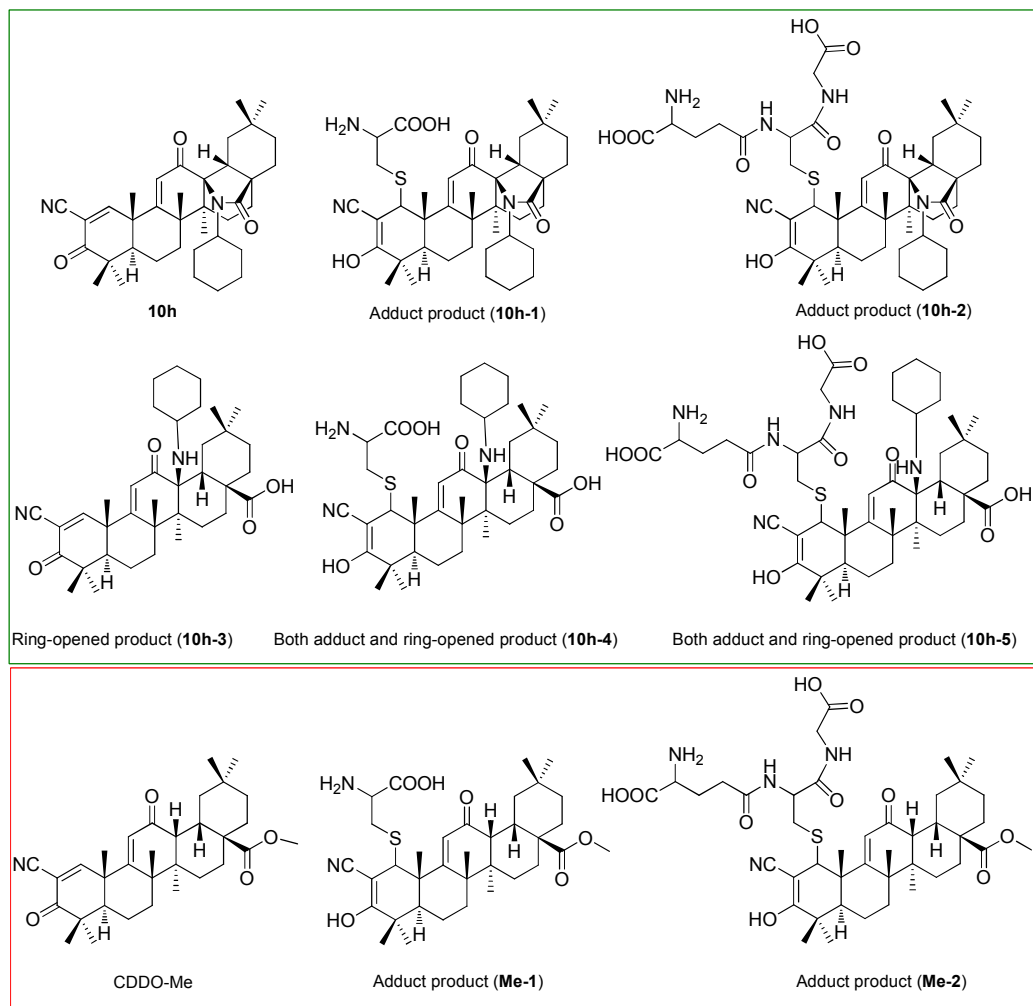

| Possible metabolic products          | Compd      | Cys | GSH | Rat plasma | HLM |
|--------------------------------------|------------|-----|-----|------------|-----|
| Adduct products                      | <b>10h</b> | yes | yes | yes        | yes |
|                                      | CDDO-Me    | yes | yes | yes        | yes |
| Ring-opened products                 | <b>10h</b> | no  | no  | no         | no  |
| Both adduct and ring-opened products | <b>10h</b> | no  | no  | no         | no  |

<sup>a</sup>Test compound (2  $\mu$ M) was incubated in 0.2 mg/mL of cysteine (Cys), glutathione (GSH), rat plasma, or human liver microsomes (HLM) in 0.1 M phosphate buffer at 37°C for 1h.
